# Supplementary material for: A framework for evaluating epidemic forecasts
Source: PubMed Central journal article supplement (PMC5433189; doi:10.1186/s12879-017-2365-1), 2017-05-15

Consensus Ranking over Peak Value- Region 8

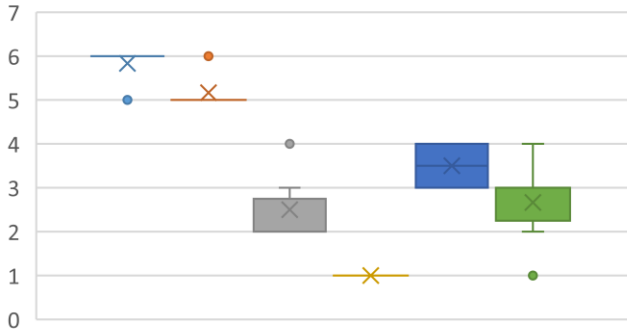

Consensus Ranking over Peak Time - Region 8

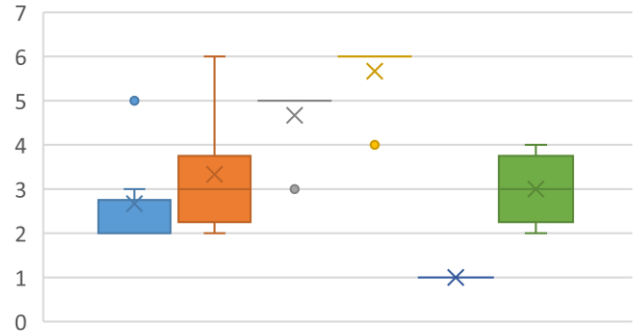

Consensus Ranking over Take-off Value - Region 8

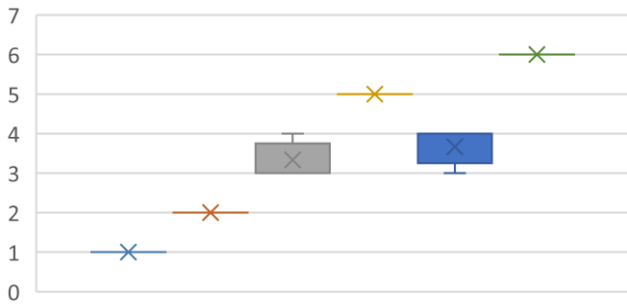

Consensus Ranking over Take-off Time- Region 8

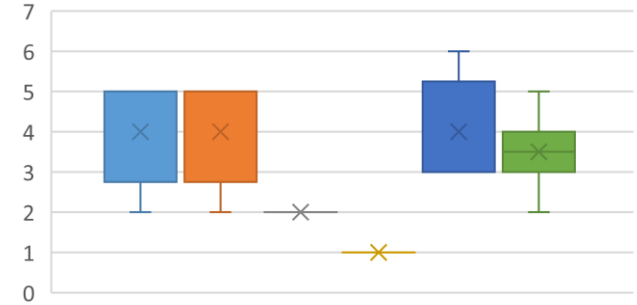

Consensus Ranking over ID's Length- Region 8

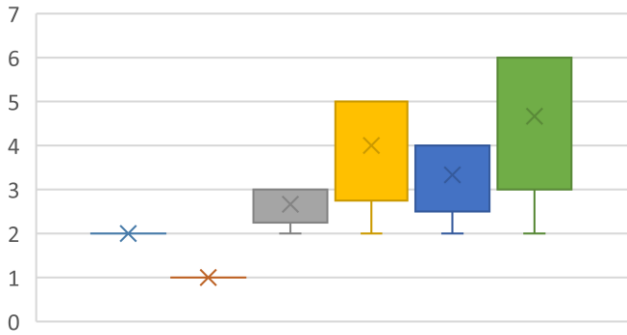

Consensus Ranking over ID's Start Time - Region 8

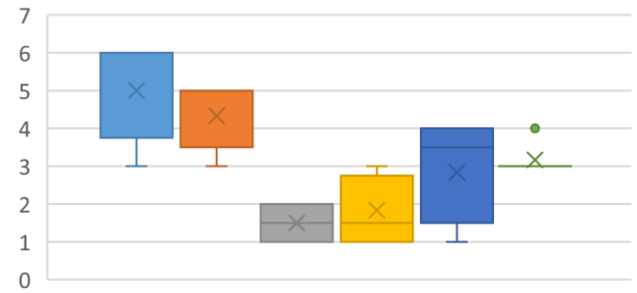

Consensus Ranking over Speed of Error - Region 8

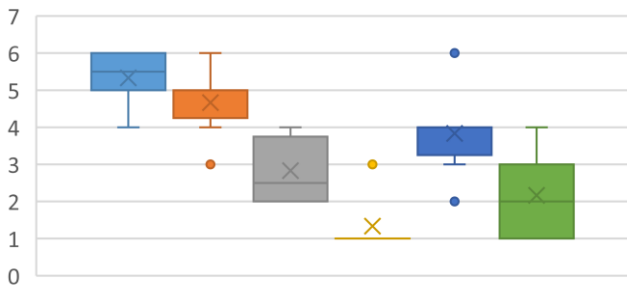

Consensus Ranking over Start-of-Flu-season- Region 8

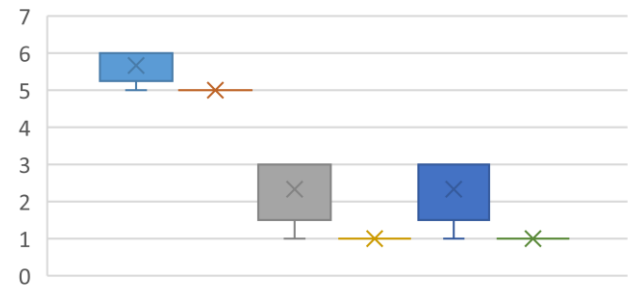

Supplement: 12879_2017_2365_MOESM10_ESM.pdf [file 12879_2017_2365_MOESM10_ESM.pdf]
