# Supplementary material for: A framework for evaluating epidemic forecasts
Source: PubMed Central journal article supplement (PMC5433189; doi:10.1186/s12879-017-2365-1), 2017-05-15

Consensus Ranking over Peak Value - Region 9

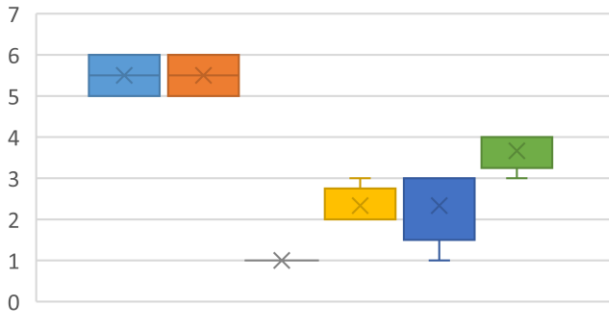

Consensus Ranking over Peak Time Region 9

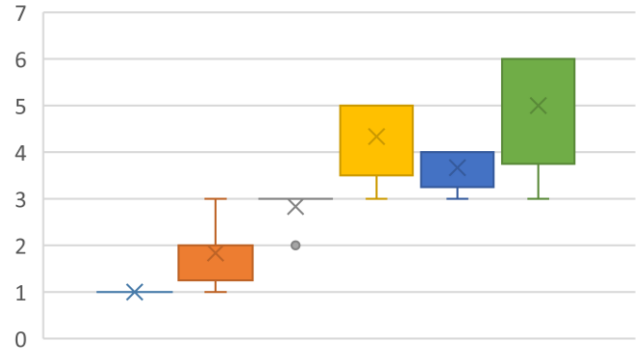

Consensus Ranking over Take-off Value-Region 9

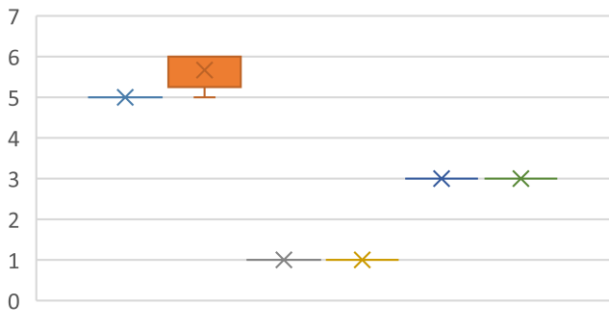

Consensus Ranking over Take-off Time-Region 9

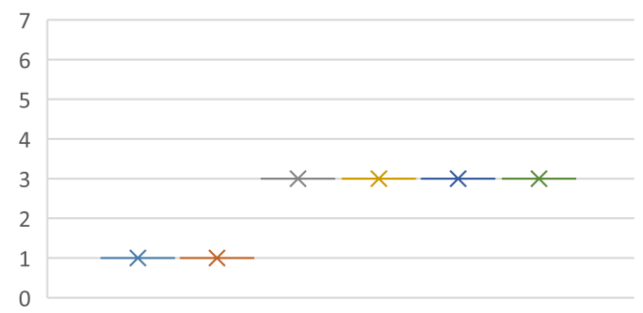

Consensus Ranking over ID's Length - Region 9

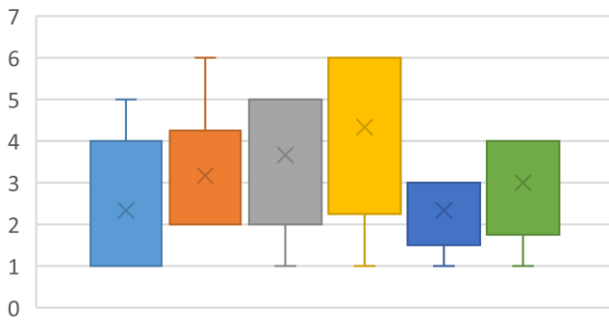

Consensus Ranking over ID's start time Region 9

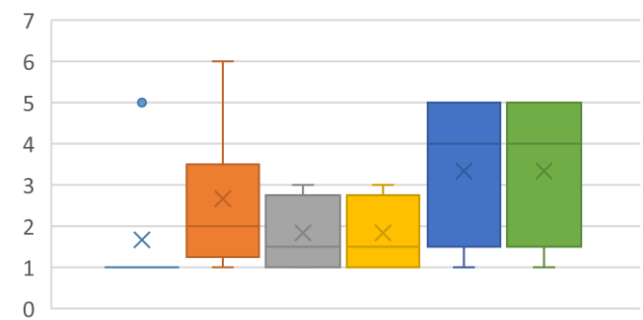

Consensus Ranking over Speed of Epidemic - Region 9

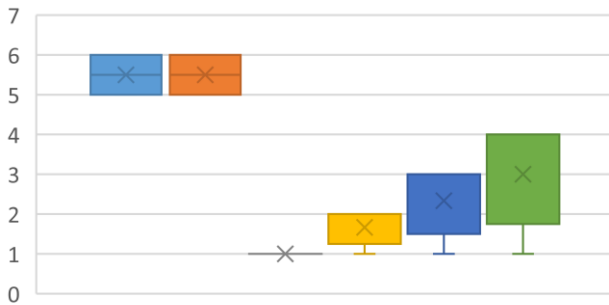

Consensus Ranking over Start-of-Flu-Season-Region 9

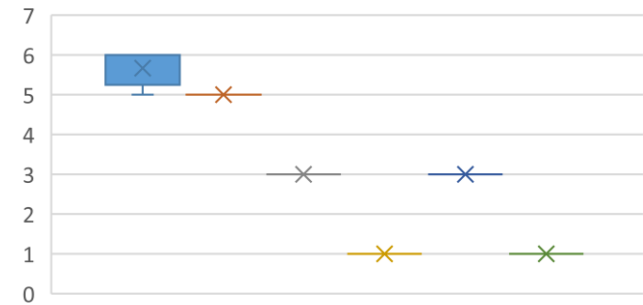

Supplement: 12879_2017_2365_MOESM11_ESM.pdf [file 12879_2017_2365_MOESM11_ESM.pdf]
