# Supplementary material for: A framework for evaluating epidemic forecasts
Source: PubMed Central journal article supplement (PMC5433189; doi:10.1186/s12879-017-2365-1), 2017-05-15

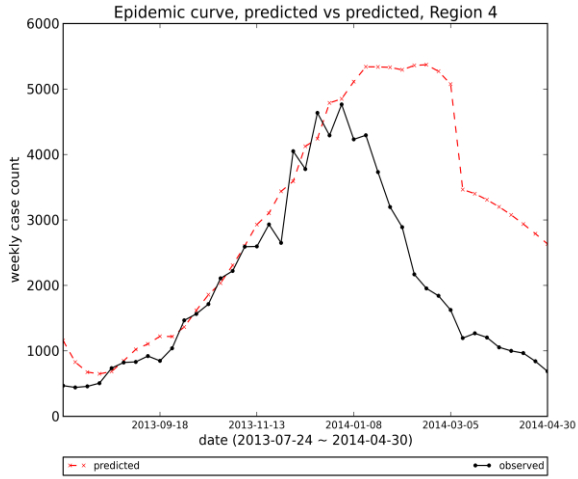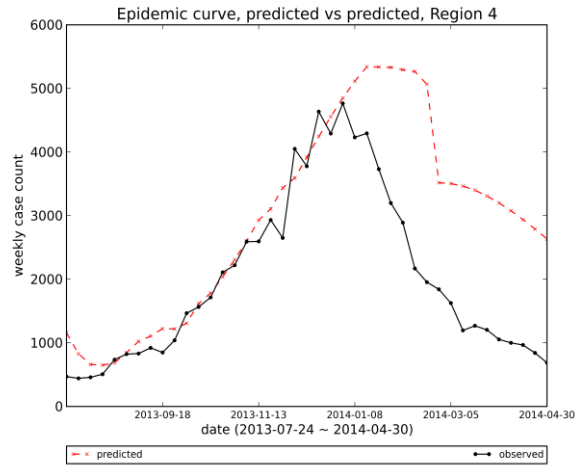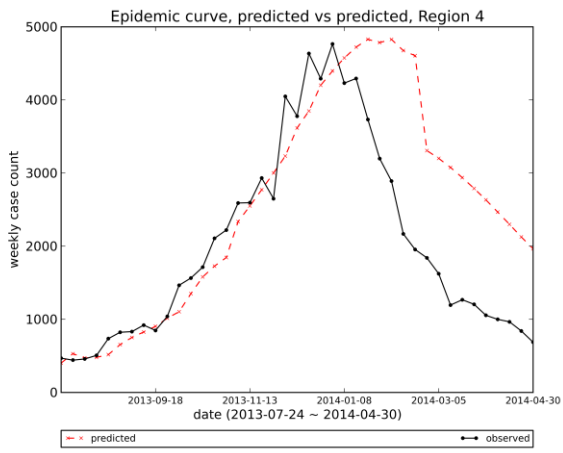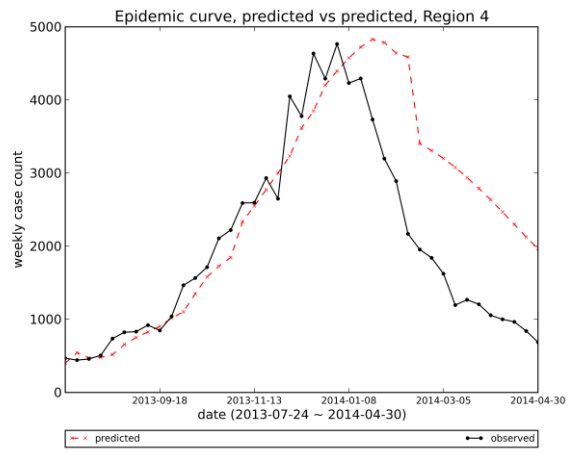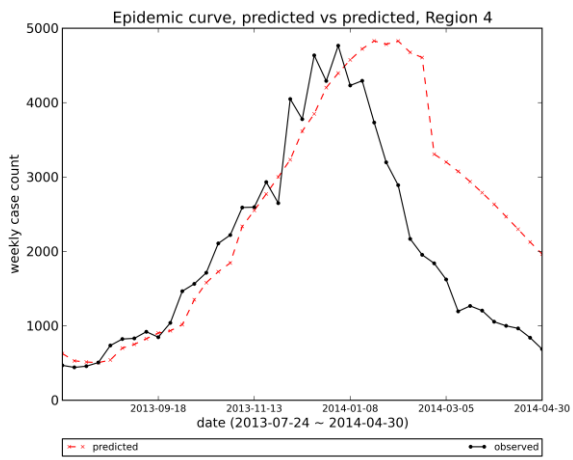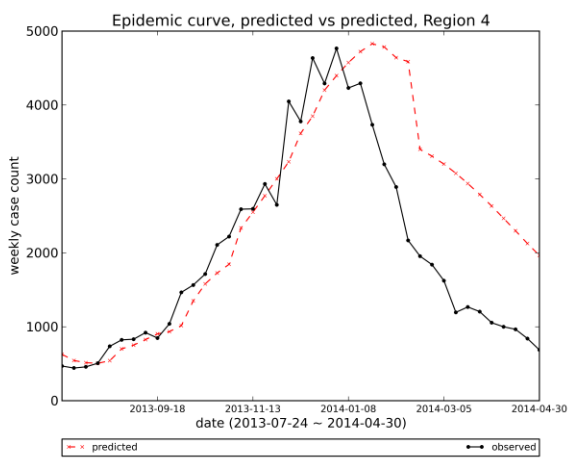

Supplement: 12879_2017_2365_MOESM15_ESM.pdf [file 12879_2017_2365_MOESM15_ESM.pdf]
