# Supplementary material for: A framework for evaluating epidemic forecasts
Source: Springer Nature journal article supplement (doi:10.1186/s12879-017-2365-1), 2017-05-15

Consensus Ranking over Peak value - Region2

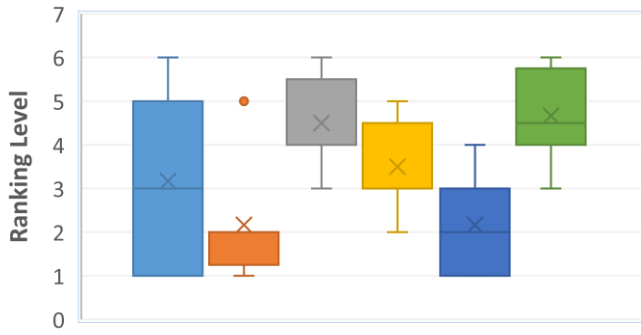

Consensus Ranking over Peak value - Region2

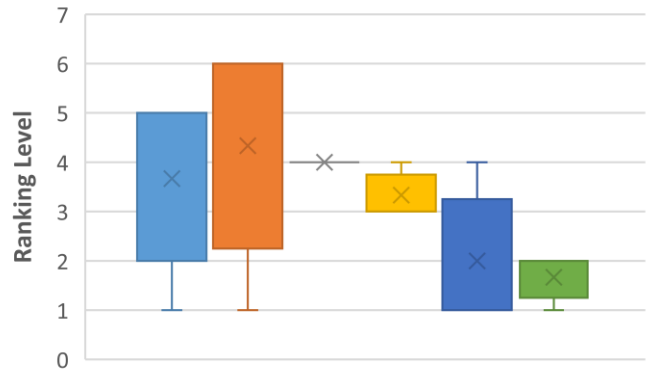

Consensus Ranking over Take-off Value - Region2

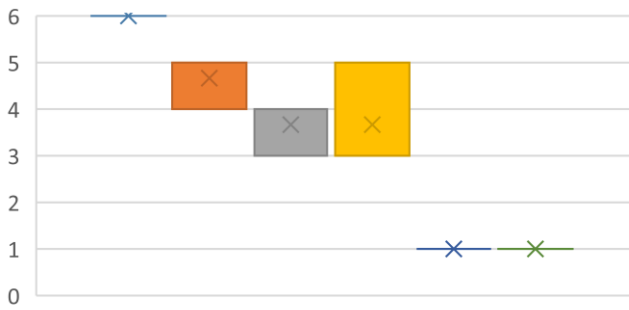

Consensus Ranking over Take-off Time - Region2

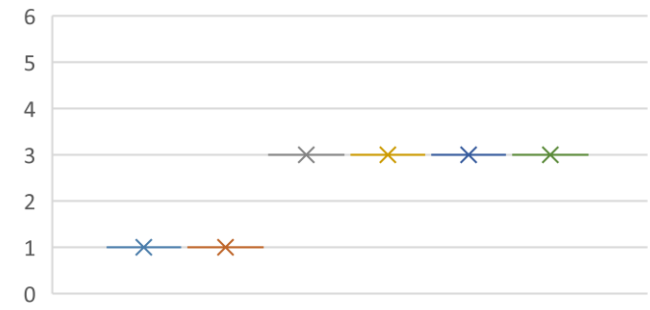

Consensus Ranking over ID's Length- Region2

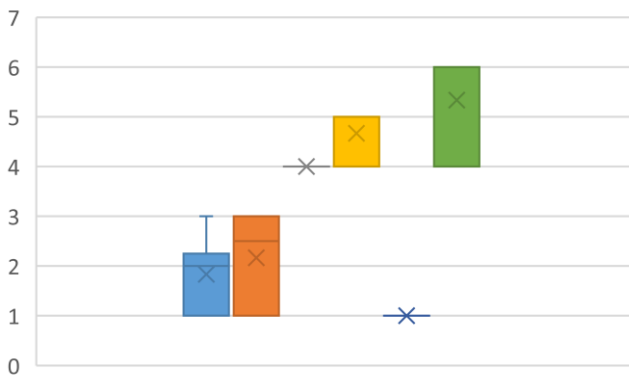

Consensus Ranking over ID's start time - Region2

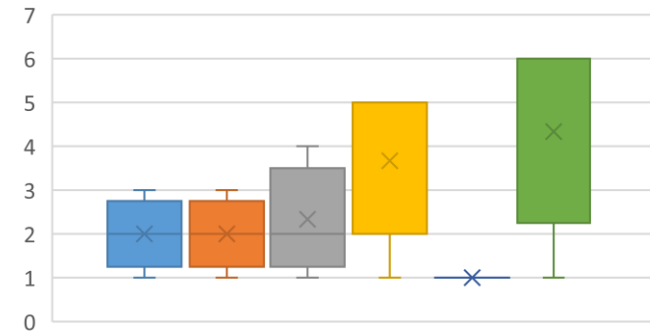

Consensus Ranking over Speed of epidemic - Region2

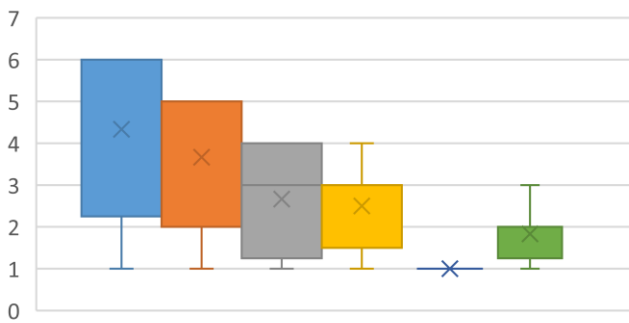

Consensus Ranking over Start-of-flu-season - Region2

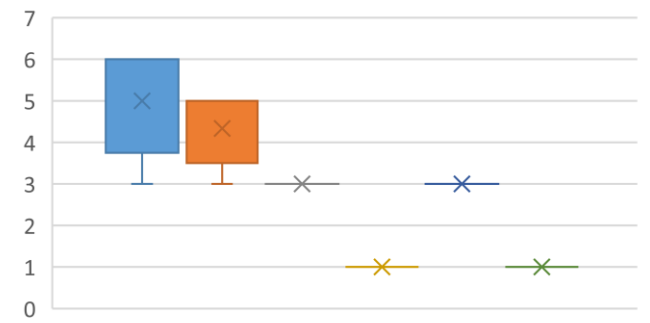

Supplement: MOESM4 [file 12289102]
