# Supplementary material for: A framework for evaluating epidemic forecasts
Source: Springer Nature journal article supplement (doi:10.1186/s12879-017-2365-1), 2017-05-15

Consensus Ranking over Peak Value - Region 3

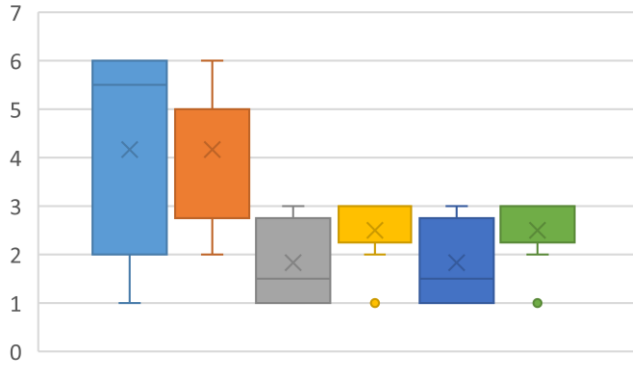

Consensus Ranking over Peak Time - Region3

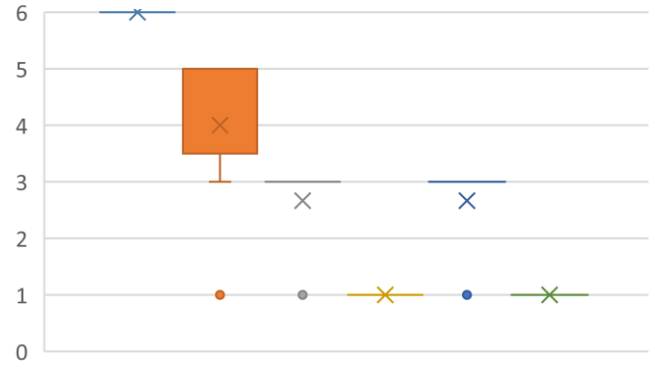

Consensus Ranking over Take-off Value - Region3

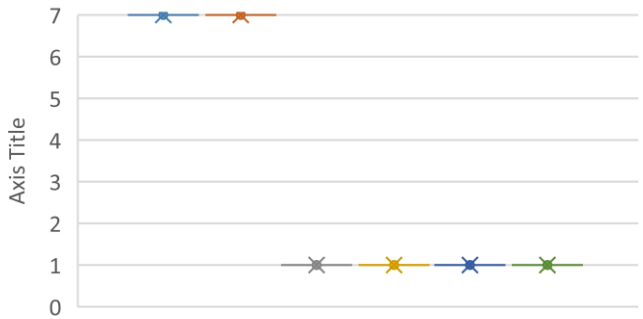

Consensus Ranking over Take-off Value - Region3

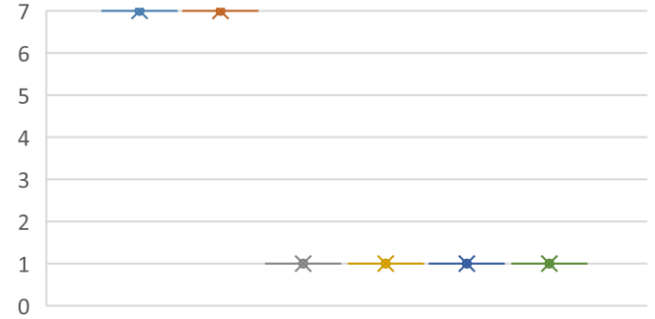

Consensus Ranking over ID length- Region3

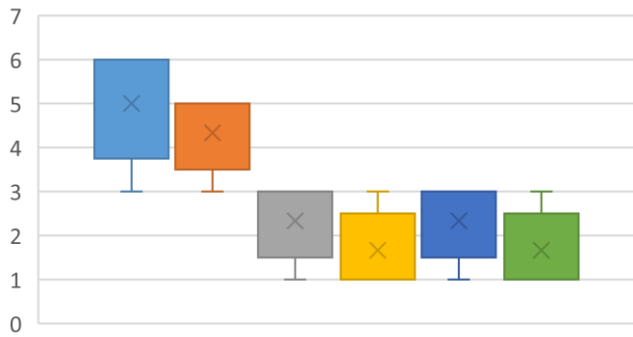

Consensus Ranking over ID-start time - Region3

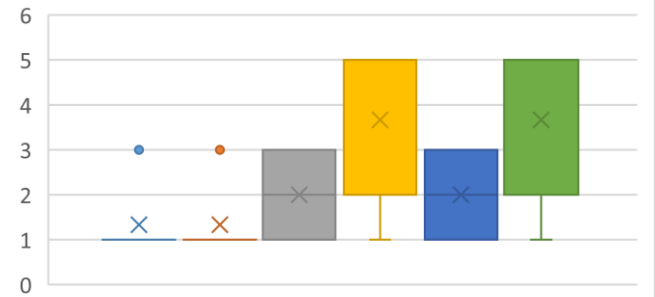

Consensus Ranking over Speed pf Epidemic - Region 3

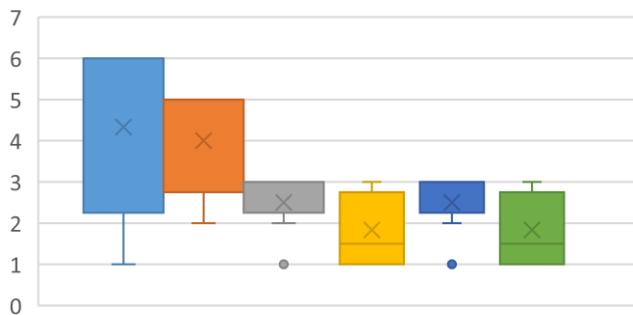

Consensus Ranking over start-of-fu-season - Region3

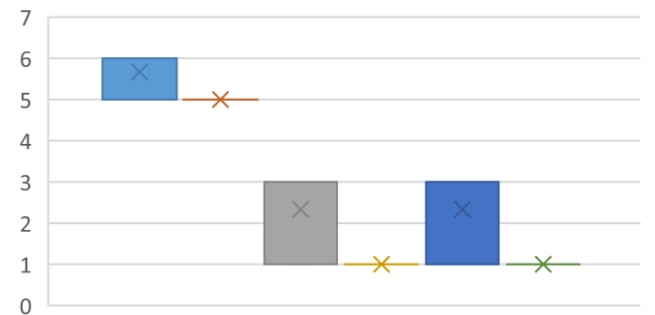

Supplement: MOESM5 [file 12289102]
