# Supplementary material for: A framework for evaluating epidemic forecasts
Source: Springer Nature journal article supplement (doi:10.1186/s12879-017-2365-1), 2017-05-15

Consensus Ranking over Peak Value - Region 7

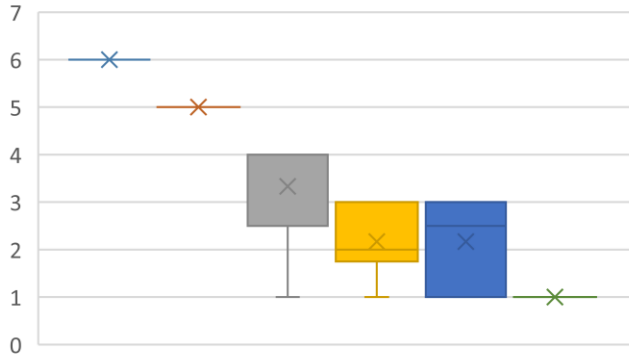

Consensus Ranking over Peak Time - Region 7

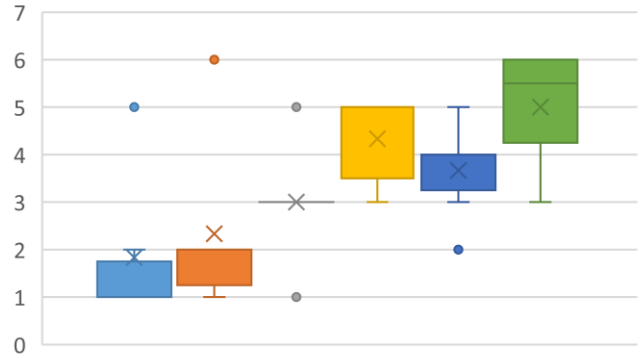

Consensus Ranking over Take-off Value - Region 7

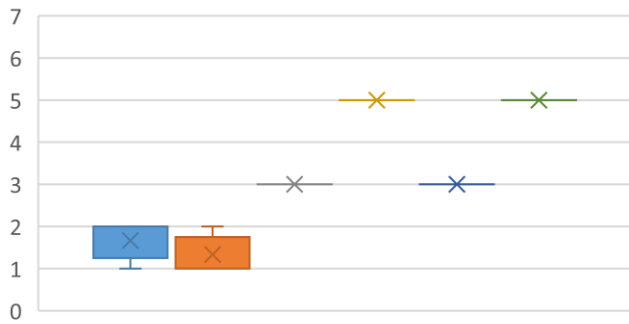

Consensus Ranking over Take-off Time - Region 7

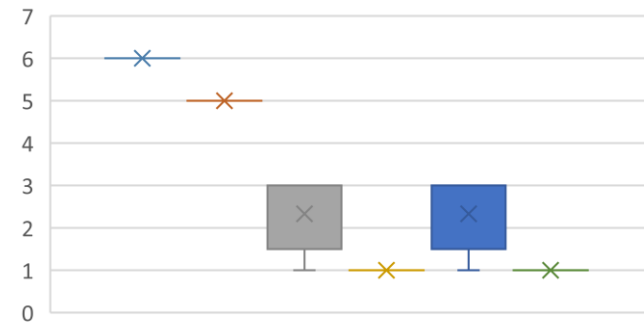

Consensus Ranking over Speed of Epidemic - Region 7

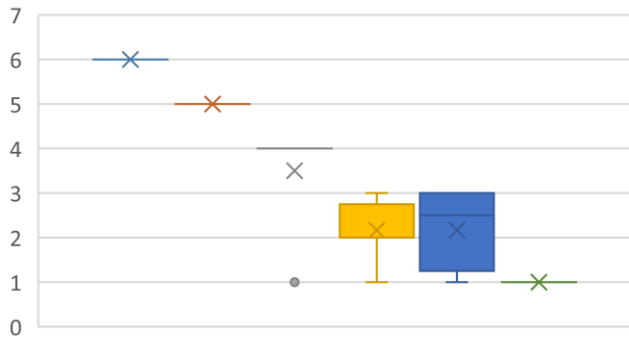

Consensus Ranking over start-of-flu-season - Region 7

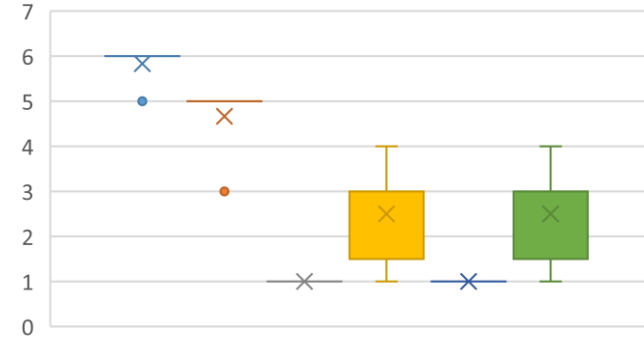

Supplement: MOESM9 [file 12289102]
