# Supplementary material for: A framework for evaluating epidemic forecasts
Source: Springer Nature journal article supplement (doi:10.1186/s12879-017-2365-1), 2017-05-15

Consensus Ranking over Peak Value - Region 10

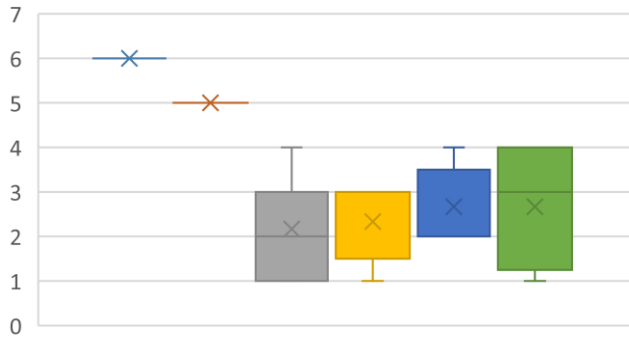

Consensus Ranking over Peak Time - Region 10

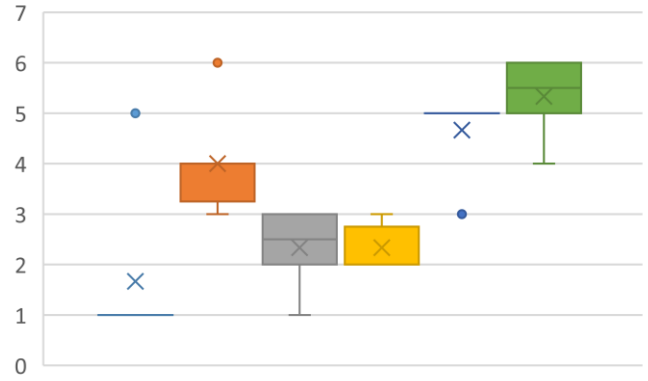

Consensus Ranking over Speed of Epidemic - Region 10

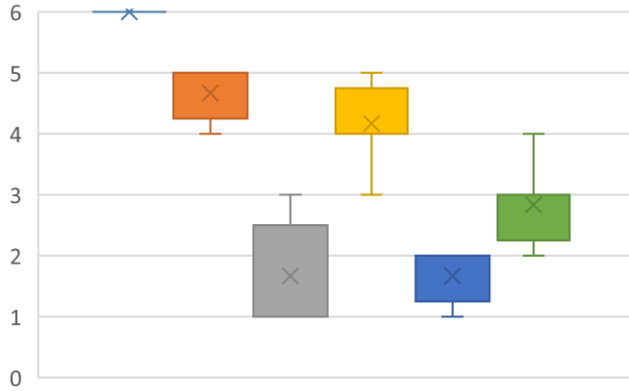

Consensus Ranking over Start-of-Flu-season - Region 10

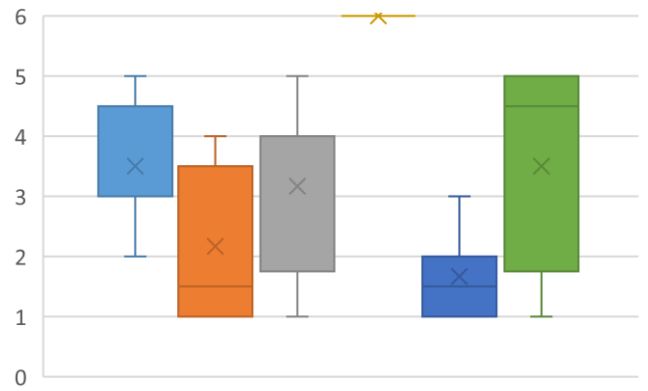

Supplement: MOESM12 [file 12289102]
