# Supplementary material for: A framework for evaluating epidemic forecasts
Source: Springer Nature journal article supplement (doi:10.1186/s12879-017-2365-1), 2017-05-15

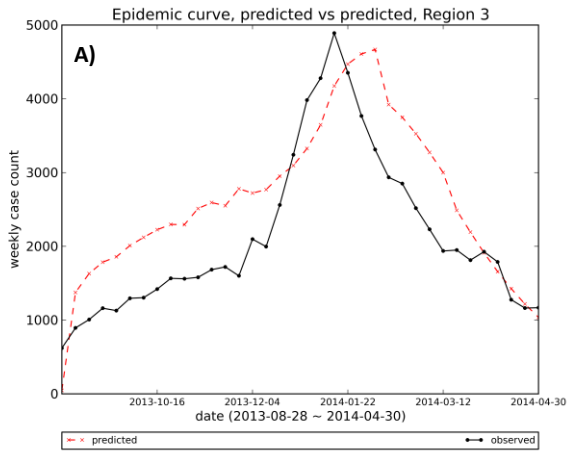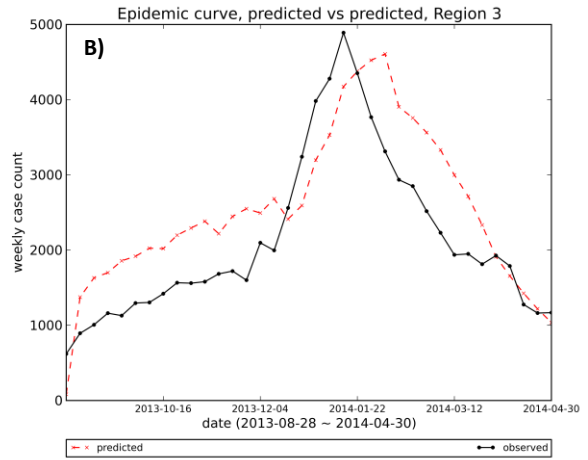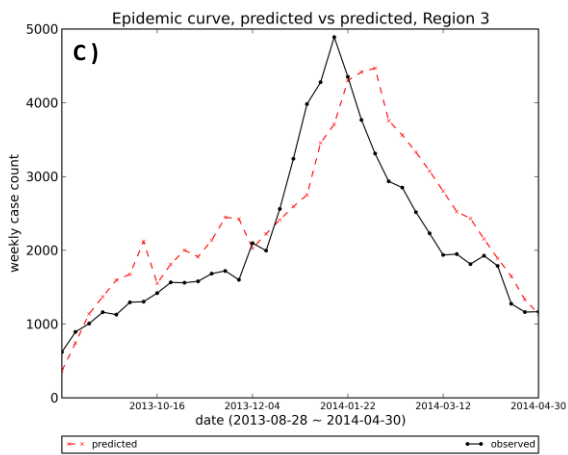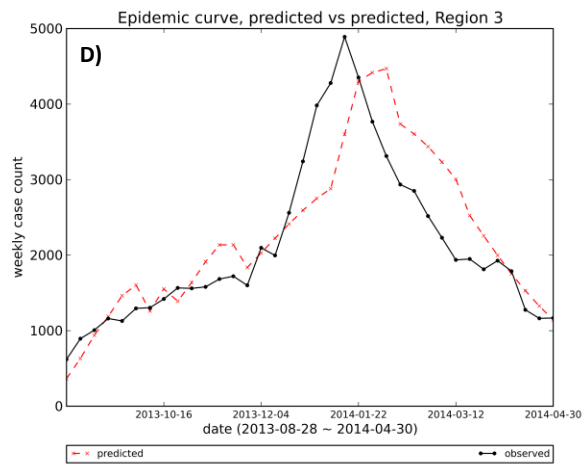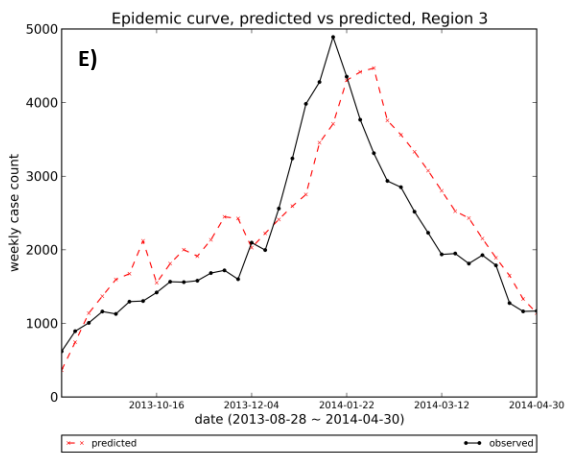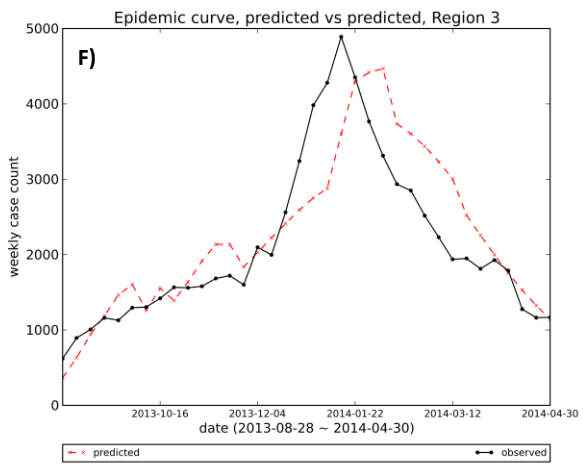

Supplement: MOESM14 [file 12289102]
